# Supplementary material
Source: publisher figshare collection journal article supplement (https://gsajournals.figshare.com/ndownloader/files/28321899)
Supplement: Supplementary file 1 [file 28321899]

## Sheet: Table S1-16
Table S1 The primer sequences used for amplification
Gene name	Forward primers	Reverse primers	Experiment
Glyma02g270800-1	TCCACACTCTCATTGAAACTGTTA	GAGTGGATAGGTAATAAACATCCC	gene sequencing
Glyma02g270800-2	ACGCCAATCTCACCACCGTTGAGC	ATACGAAAATTTACCCGTACCATC	gene sequencing
Glyma02g270800-3	CATGAGGATTATTTTCAGCTTGAT	GCCAGAAACTTGTCAATCCACCCT	gene sequencing
Glyma02g270800-4	ATTAGTGAAACATACGGCTTTCCC	GATCCCTCAACACAATATCCAATC	gene sequencing
Glyma02g270800-5	GAGAGTTCTACATGCTTCTCCCAA	TATCTGCAGGAAATCCAGGTAATC	gene sequencing
Glyma02g270800-6	TTATTGATGAACGGATCATAACGA	TCTATTAGGAGTCAAAACAGGGGT	gene sequencing
Glyma.02g227200	ATTCTAGGTTTTTACGCACC	ATCTTAAACGGTGGAGGAGC	qRT-PCR
Glyma.05g046700	AAGACGCCGCTCAAATACAC	TTCTTAGCCCCAACTCTTTG	qRT-PCR
Glyma.06g063200	TAACAAGCAGGGCTCACAGCT	GATGCTGTAACTTCCTTCAGG	qRT-PCR
Glyma.07g007700	CACAGCTCAGTTGGATAGAC	CTTCAGGACAGCTTTCAACC	qRT-PCR
Glyma.10g172200	AACTACAAATGCCACTCAC	TAGAGCAACAAATCAGGATC	qRT-PCR
Glyma.10g227300	GCTTTTCTGTGTGATTCAAC	CTCACACACACAAAAGCATT	qRT-PCR
Glyma.13g063700	ACCACACTTCACACCTCTCT	ATCTGAAACAACAACCCCTT	qRT-PCR
Glyma.16g133500	AGTCCCGAATCATGCCACAT	TGGTGAGGGTGGCTAAGTGT	qRT-PCR
Glyma.18g027400	ATCTGCCTGTAAAAATGGCC	AAAGGGGTATCTGAGCGATC	qRT-PCR
Glyma.20g221400	ACTTCCAATTCCCATCATAC	AGAAAGTAGGTGGTGTCGGC	qRT-PCR
Glyma.06g202200	TGCTACATCCCCAACCAAAC	CGAGTATGGAGCGTTTTGGT	qRT-PCR
Glyma.07g089500	CATGCTACCCTTCTATTGTT	GGATTTGCTGCGTTGAATAC	qRT-PCR
Glyma.07g212800	ACCTCTGACCTCTTGCTTAC	GGAAGAAGGAAAGTAGTGTG	qRT-PCR
Glyma.10g017000	CACTTTCACATTGCCTCTTC	TTATGAGTGGCAAAGCGAGG	qRT-PCR
Glyma.12g036900	TGAGAAGGGAAGTTGCTGTG	CTCCACACATTTCCATTCGG	qRT-PCR
Glyma.13g030400	CTCTGTCAAAACGACGGCG	TCTCCACTCGTAACTGCGC	qRT-PCR
Glyma.14g046600	CCAAACAGAGAAGAAGAGAG	TTGTGTGGGAATGAAGTCC	qRT-PCR
Glyma.14g156400	AAGGTGAAGTGCGTTTGAGG	TCTCCACAATCCCTGAAGCT	qRT-PCR
Glyma.15g243100	ACTCGTCGTTTGTGTGTGTT	GCAATTCACAAGACCCAGAT	qRT-PCR
Glyma.17g027300	AACACAAACCACATTCGCCC	ACAGTGGATGGAGATGGGAG	qRT-PCR
Tubulin	GGAGTTCACAGAGGCAGAG	CACTTACGCATCACATAGCA	qRT-PCR
